# Supplementary material
Source: Springer Nature journal article supplement (https://www.springermedizin.de/resource/supplementary/12935_2011_305_MOESM4_ESM.pdf/9540276)

control

0.05 mM

0.5 mM

5 mM

24 h

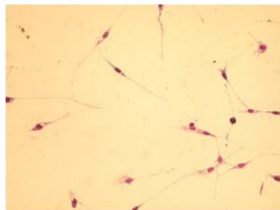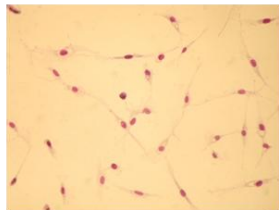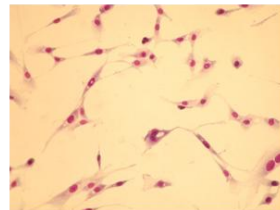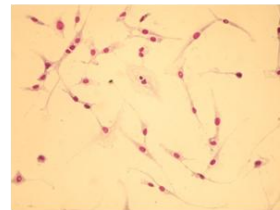

48 h

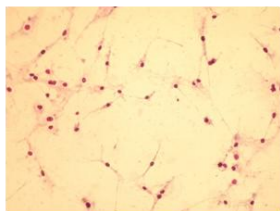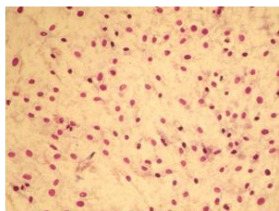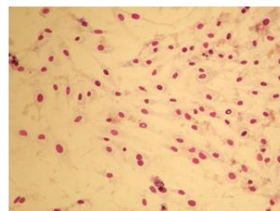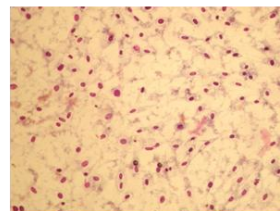

72 h

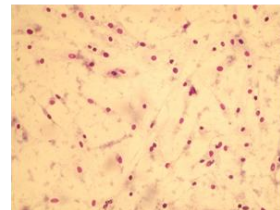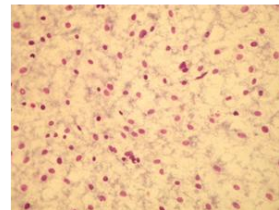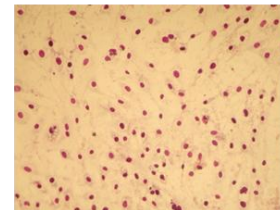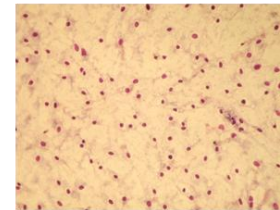

Supplement: MOESM4 [file 9540276]
